# Supplementary material for: Deletions in VANGL1 are a risk factor for antibody-mediated kidney disease
Source: PubMed Central journal article supplement — Cell Rep Med. 2021 Dec 21;2(12):100475. doi: 10.1016/j.xcrm.2021.100475 (PMC8714939; doi:10.1016/j.xcrm.2021.100475), 2021-12-21
Supplement: mmc1.pdf [file mmc1.pdf]

**Supplemental information**

**Deletions in *VANGL1* are a risk factor for  
antibody-mediated kidney disease**

**Simon H. Jiang, Sevcan Mercan, Ilenia Papa, Max Moldovan, Giles D. Walters, Mark Koina, Mitali Fadia, Maurice Stanley, Tom Lea-Henry, Amelia Cook, Julia Ellyard, Brendan McMorran, Madhivanan Sundaram, Russell Thomson, Pablo F. Canete, Wendy Hoy, Holly Hutton, Monika Srivastava, Kathryn McKeon, Iñigo de la Rúa Figueroa, Ricard Cervera, Raquel Faria, Sandra D'Alfonso, Mariele Gatto, Vicki Athanasopoulos, Matthew Field, John Mathews, Eun Cho, Thomas D. Andrews, A. Richard Kitching, Matthew C. Cook, Marta Alarcon Riquelme, Melanie Bahlo, and Carola G. Vinuesa**

# Supplementary Figure 1

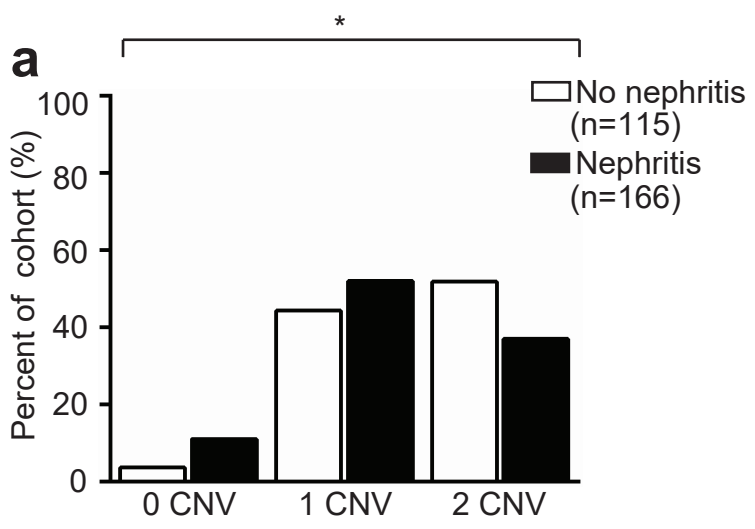

Figure S1. *VANGL1* CNV association with nephritis. Association of copy number variation in *VANGL1* detected by qPCR with the presence or absence of nephritis in SLE;  $\chi^2=2.1$ , 1 d.f.,  $p=0.14$  (CNV: Copy number variation). Related to Figure 1

## Supplementary Figure 2

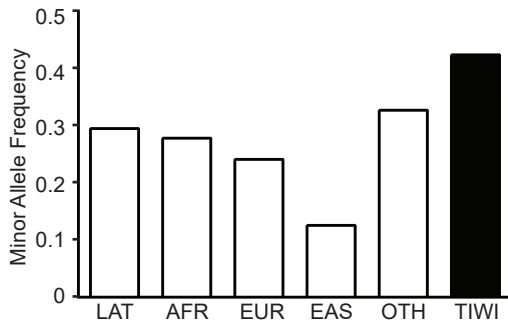

Figure S2. Increased frequency of *VANGL1* CNV in the Tiwi Islands a) Minor Allele Frequency of *VANGL1* CNV in different ethnicities; LAT: Latino, AFR: African, EUR: European, EAS: East Asian, OTH: Other. b) Number of individuals in the Tiwi Islands with a *VANGL1* CNV according to stage of kidney disease. (CKD = chronic kidney disease). Related to Figure 1

# Supplementary Figure 3

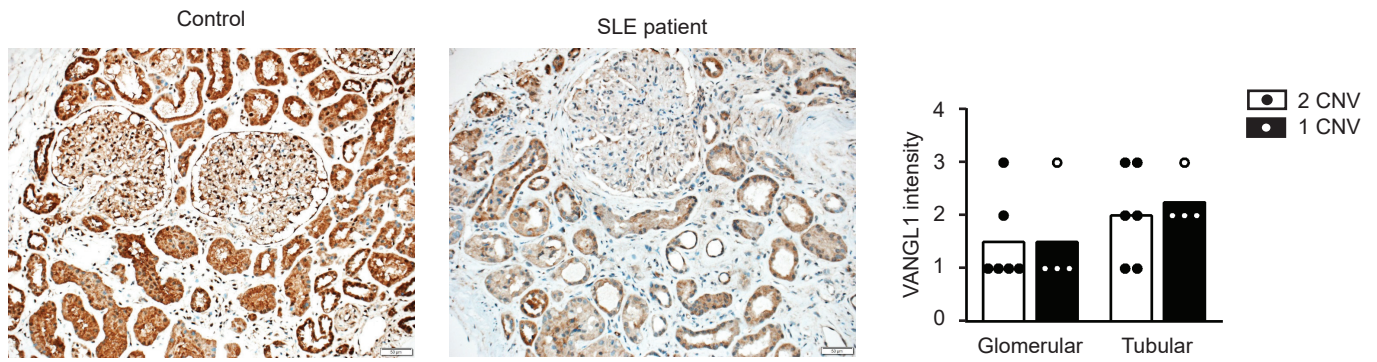

Figure S3. VANGL1 expression in human kidney samples. Representative VANGL1 expression and quantification in healthy and SLE patients with total glomerular and tubular scores. Related to Table 2

## Supplementary Figure 4

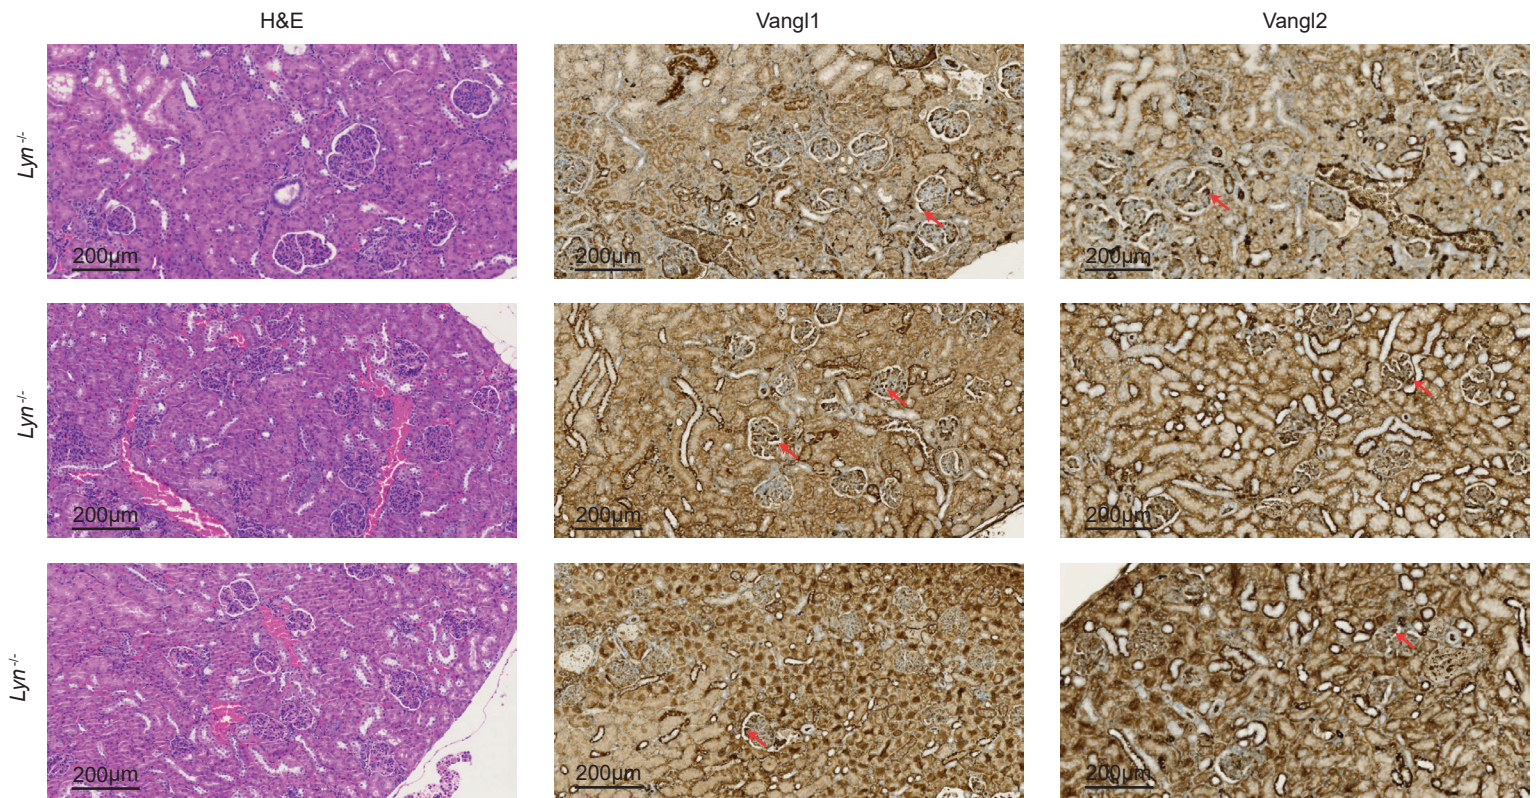

Figure S4. Vangl1 and Vangl2 expression in mouse glomeruli. Kidney sections from 12 week old *Lyn<sup>-/-</sup>* mice with glomerulonephritis and corresponding scattered glomerular expression of Vangl1 and Vangl2 (red arrow). Related to Figure 3
